# Supplementary material
Source: publisher site journal article supplement (https://www.dovepress.com/article/532952)
Supplement: Supplementary file 1 [file Supplementary%20File%201%20%25252528Patient%20survey%25252529_1.docx]

**Supplementary file 1: Iron Deficiency Anemia (IDA) Patient Survey**

# Screening questions

In which country or region do you currently reside?

- United States of America
- Australia
- Brazil
- Canada
- China
- France
- Germany
- India
- Italy
- Japan
- Mexico
- Spain
- United Kingdom
- Other country

Do you currently describe yourself as…? *Please select all that apply.*

- Male
- Female
- Non-binary
- Gender non-conforming
- I identify as (please specify)
- Prefer not to answer

What is your age?

- |_|_|

Which of the following chronic conditions, if any, have you been diagnosed with by a health care provider? *Please select all that apply.*

- Anemia
- Congenital heart disease
- Chronic heart failure / congestive heart failure
- HIV/AIDs
- Rheumatoid Arthritis
- Diabetes (Type I or II)
- Collins’ Syndrome
- None of the above
- Decline to answer

You mentioned you have been diagnosed with Anemia by a health care provider. With which of the following types of Anemia have you been diagnosed? *Please select all that apply.*

- Iron deficiency anemia
- Aplastic anemia
- Sickle cell anemia
- Thalassemia
- Vitamin deficiency anemia
- Another type of anemia that’s not on this list
- I’m not sure

Which of the following types of iron treatments, if any, are you currently being prescribed? *Please select all that apply.*

- Intravenous (IV) iron therapy (e.g., IV iron, iron infusions, or iron injections)
- Oral iron tablet
- Something else that’s not on this list
- I’m not sure which iron treatments I am currently being prescribed
- I’m not being prescribed any iron treatments currently

Approximately how many IV iron therapy infusions have you ever received? *Your best estimate is fine.*

- |_|_|
- I’m not sure

How often are you supposed to get your IV iron therapy dose(s) or infusion(s)?

- |_|_| infusions per month
- I’m not sure

To the best of your knowledge, what dosage of IV iron therapy are you currently being prescribed?

- High dose IV iron therapy (1 infusion per month)
- High dose IV iron therapy (2 infusions per month)
- Low dose IV iron therapy (3 or more infusions per month)
- I’m not sure

Which of the following best describes the medical reason(s) for the IV iron therapy you are being prescribed? *Please select all that apply.*

- Heavy menstrual bleeding
- Endometriosis
- Pregnancy
- Inflammatory Bowel Disease (IBD) (i.e., Crohn’s disease or Ulcerative Colitis)
- Celiac disease
- Non-hemodialysis dependent chronic kidney disease
- Stomach ulcer
- Cancer
- Gastric bypass surgery
- Chronic heart failure / heart failure
- Nonsteroidal anti-inflammatory drug use (e.g., ibuprofen, high-dose aspirin, naproxen, diclofenac, celecoxib, mefenamic acid, etoricoxib, indomethacin, etc.)
- I’m not sure the medical reason why I was prescribed IV iron therapy
- Other

# Patient background

Approximately how long ago were you diagnosed with iron deficiency anemia (IDA)? *Your best estimate is fine.*

- |_|_| months
- |_|_| years

Before you started receiving IV iron therapy, which iron deficiency anemia symptom(s) did you experience? *Please select all that apply.*

- Fatigue (e.g., tiredness, lack of energy, etc.)
- Weakness
- Headache
- Unusual cravings (e.g., ice, clay, paper, etc.)
- Pale skin
- Cold hands and feet
- Brittle nails
- Hair loss
- Dizziness
- Poor appetite
- Sore tongue / mouth
- Chest pain
- Shortness of breath
- Fast or noticeable heartbeats (e.g., palpitations, etc.)
- Ringing sound in ears (e.g., tinnitus, etc.)
- Other
- I did not have any IDA symptoms

Approximately how long prior to being diagnosed with iron deficiency anemia were you experiencing symptoms? *Your best estimate is fine.*

- |_|_| months
- |_|_| years
- I did not have any IDA symptoms

Approximately how long ago were you first prescribed IV iron therapy? *Your best estimate is fine.*

- |_|_| months
- |_|_| years

Which of the following treatment options were presented to you when you were told you needed IV iron therapy? *Please select all that apply.*

- High dose IV iron therapy (1 infusion per month)
- High dose IV iron therapy (2 infusions per month)
- Low dose IV iron therapy (3 or more infusions per month)
- I’m not sure or don’t remember which options were presented to me
- I was not presented with treatment options when I was told I needed IV iron therapy

Which of the following, if any, did your health care provider discuss with you about the process of receiving IV iron therapy prior to your first IV iron dose? *Please select all that apply.*

- Where to go to receive IV iron doses
- How often I would need to go to receive IV iron doses
- The amount of time it would take to receive IV iron doses
- Side effects to expect with IV iron doses
- Potential risks or adverse events associated with IV iron doses
- My health care provider didn’t discuss any of these things with me

You mentioned that your health care provider discussed some aspects of the process of receiving IV iron therapy. Now that you have received IV iron doses, looking back on the conversation(s) you had with your provider about the process of receiving IV iron prior to your first dose, how accurately did they describe the realities of the infusion process?

- Not at all accurately
- Not very accurately
- Somewhat accurately
- Very accurately

Which of the following symptoms, if any, have improved since receiving IV iron therapy? *Please select all that apply.*

- Fatigue (e.g., tiredness, lack of energy, etc.)
- Weakness
- Headache
- Unusual cravings (e.g., ice, clay, paper, etc.)
- Pale skin
- Cold hands and feet
- Brittle nails
- Hair loss
- Dizziness
- Poor appetite
- Sore tongue / mouth
- Chest pain
- Shortness of breath
- Fast or noticeable heartbeats (e.g., palpitations, etc.)
- Ringing sound in ears (e.g., tinnitus, etc.)
- Other
- None of my symptoms have improved since receiving IV iron therapy

To what extent do you agree or disagree with the following statements about living with iron deficiency anemia (IDA)?

- Strongly disagree
- Somewhat disagree
- Somewhat agree
- Strongly agree
- Getting my IDA IV iron treatments gets in the way of me being productive
- I have to schedule my life around my IDA IV iron treatments
- The time I spend in the infusion chair feels like time wasted
- I want the most convenient treatment for IDA
- Getting my IDA IV iron treatments has made me miss important events

# Patient burden of IDA treatments

Earlier you mentioned you are currently receiving IV iron therapy. How would you rate the following aspects of IV iron therapy?

- Not at all satisfactory
- Not very satisfactory
- Somewhat satisfactory
- Very satisfactory
- Overall experience
- Effectiveness of treating my symptoms
- How often you need to get infusions
- Ease of administration

Which of the following best describes the setting in which your IV iron therapy is usually administered? If you have gone to more than one setting in the past, please select the setting in which you most frequently get your IV iron therapy. *Please select one.*

- My doctor’s office
- A hospital
- An infusion center
- In-home health care provider visit (i.e., home infusions)
- Somewhere else

For a typical visit to get your IV iron treatment, approximately how much time do you spend getting to the location (e.g., doctor’s office, infusion center, etc.) where your IV iron therapy is administered?

- |_|_| minutes
- |_|_| hours

For a typical visit, once you are at the location of where your IV iron is administered, approximately how much time does it take to start the IV iron therapy dose?

- |_|_| minutes
- |_|_| hours

For a typical visit to get your IV iron treatment, what is the length of the infusion time you spend receiving your IV iron therapy dose(s) – i.e., the time between when the infusion starts and when you get up from the infusion chair?

- |_|_| minutes
- |_|_| hours

Typically, how much time do you spend scheduling, rescheduling, and confirming each of your IV iron therapy sessions?

- |_|_| minutes
- |_|_| hours

How much has the process of receiving IV iron doses impacted your day-to-day life, if at all?

- Very negative impact
- Some negative impact
- No impact
- Somewhat positive impact
- Very positive impact
- Not applicable
- Missing work
- Missing school
- Missing social events or obligations
- Missing important family events or moments
- Spending time with loved ones
- Having free time in my day
- Having time for hobbies
- Having time for my tasks / responsibilities

Which of the following day-to-day activities, if any, have improved since receiving IV iron therapy treatments? *Please select all that apply.*

- Being productive at work
- Going to work
- Exercising
- Caring for myself
- Caring for my family
- Spending time with loved ones
- Doing things around the house
- Something else
- I haven’t noticed any improvements in my day-to-day activities since IV iron therapy

Have you ever been diagnosed by a health care provider with hypophosphatemia (i.e., been told you have low phosphate levels or need to monitor your phosphate levels) as a result of your IV iron treatment?

- Yes
- No
- I’m not sure

You indicated that you have been diagnosed with hypophosphatemia, or low phosphate levels in your blood. Which of the following symptom(s), if any, have you experienced due to your hypophosphatemia?

- Confusion
- Appetite loss
- Muscle weakness
- Muscle pain
- Seizures
- Feeling tired
- Bone pain or broken bones
- Tooth decay
- Numbness
- Irritability
- Heart failure
- Other
- I have not experienced any symptoms due to my hypophosphatemia

You indicated that you have been diagnosed with hypophosphatemia. How burdensome are the symptoms associated with hypophosphatemia?

- Not at all burdensome
- Not very burdensome
- Somewhat burdensome
- Very burdensome

Approximately how many additional visits to a health care provider have you had to go to since your hypophosphatemia diagnosis? *Your best guess is fine.*

- |_|_|_|

To what extent do you agree or disagree with the following statements about receiving IV iron therapy?

- Strongly disagree
- Somewhat disagree
- Somewhat agree
- Strongly agree
- I prefer single-dose IV iron therapy to multi-dose therapy
- Having fewer required healthcare visits related to my IDA therapy would ease some of the burden of having this condition
- I would like to get time back in my day from time spent receiving IV iron therapy
- I would be interested in receiving single-dose IV iron therapy options if available
- The fewer trips I have to take to receive my IV iron therapy, the better
- It's difficult for me to attend all of my scheduled visits
- I would be willing to pay more for a single dose of IV iron therapy than multiple-dose IV iron therapy (e.g., higher co-pay or out-of-pocket cost)
- I would attend more, if not all, of my IV iron therapy doses if they were less frequent

# Consequences of missing IV therapy treatments

Have you ever skipped or missed an IV iron therapy dose?

- Yes, only once
- Yes, more than once
- No, I have never missed an IV iron dose

You indicated you have skipped or missed an IV iron therapy dose. What was the reason for missing the treatment?

- I was not able to make the appointment due to a conflict
- I didn’t feel like going
- I couldn’t fit the appointment into my schedule
- I forgot about the appointment
- I was not able to make the appointment due to transportation difficulties
- Something else
- I don’t recall

When considering an IV iron treatment, which of the following would be your top considerations?

- Fewer appointments
- Fewer hours of work missed
- Fewer infusions/needle sticks
- Less time spent traveling to appointments
- Less time spent in-chair receiving infusions
- Lower risk of side effects
- Less dependence on caretakers
- Less time spent scheduling / confirming appointments
- None of the above

# Demographics

In what state or territory do you currently reside?

- - Alabama
  - Alaska
  - Arizona
  - Arkansas
  - California
  - Colorado
  - Connecticut
  - Delaware
  - District of Columbia
  - Florida
  - Georgia
  - Hawaii
  - Idaho
  - Illinois
  - Indiana
  - Iowa
  - Kansas
  - Kentucky
  - Louisiana
  - Maine
  - Maryland
  - Massachusetts
  - Michigan
  - Minnesota
  - Mississippi
  - Missouri
  - Montana
  - Nebraska
  - Nevada
  - New Hampshire
  - New Jersey
  - New Mexico
  - New York
  - North Carolina
  - North Dakota
  - Ohio
  - Oklahoma
  - Oregon
  - Pennsylvania
  - Rhode Island
  - South Carolina
  - South Dakota
  - Tennessee
  - Texas
  - Utah
  - Vermont
  - Virginia
  - Washington
  - West Virginia
  - Wisconsin
  - Wyoming
  - American Samoa
  - Guam
  - Northern Mariana Islands
  - Puerto Rico
  - Virgin Islands

What is your zip code?

- |_|_|_|_|_|

What is the highest level of education you have completed?

- - Less than high school
  - Completed some high school
  - High school graduate
  - Job-specific training program(s) after high school
  - Some college, but no degree
  - Associate degree
  - Bachelor’s degree (such as B.A., B.S.)
  - Some graduate school, but no degree
  - Graduate degree (such as MBA, MS, M.D., Ph.D.)

How much total combined income did all members of your household earn before taxes last year?

*This includes money from jobs; net income from business, farm, or rent; pensions; dividends; interest; social security payments; and any other money income received by members of your household who are eighteen (18) years of age or older.*

- - Less than $15,000
  - $15,000 to $24,999
  - $25,000 to $34,999
  - $35,000 to $49,999
  - $50,000 to $74,999
  - $75,000 to $99,999
  - $100,000 to $124,999
  - $125,000 to $149,999
  - $150,000 to $199,999
  - $200,000 to $249,999
  - $250,000 or more

Are you of Hispanic, Latino, or Spanish origin?

- - Yes
  - No

What is your race? *Please select all that apply.*

- White
- Black or African American
- American Indian or Alaska Native
- Asian Indian
- Chinese
- Korean
- Japanese
- Filipino
- Middle Eastern or North African
- Vietnamese
- Other Asian
- Native Hawaiian or Other Pacific Islander
- Some other race

What is your current marital status?

- - Never married
  - Married or civil union
  - Divorced
  - Separated
  - Widowed
  - Living with partner

Including yourself, how many people age 18 or older live in your household?

- |_|_|

How many people under the age of 18 live in your household?

- |_|_|

Which of the following best describes your employment status?

- Employed full time
- Employed part time
- Self-employed full time
- Self-employed part time
- Not employed, but looking for work
- Not employed and not looking for work
- Not employed, unable to work due to a disability or illness
- Retired
- Student
- Stay-at-home spouse or partner

Which of the following best describes the area where you currently reside?

- In an urban or city area
- In a suburban area next to a city
- In a small town or rural area

Are you the parent/legal guardian of any child/children who is/are…? *Please select all that apply*.

- - 2 years old or younger
  - 3-4 years old
  - 5-7 years old
  - 8-10 years old
  - 11-13 years old
  - 14-17 years old
  - 18 years of age or older
  - I am not the parent/legal guardian of any children.
  - Decline to answer

We understand that you might be concerned about sharing this information. Results are reported as averages for groups of people, and not for any specific person. The responses you provide are kept completely confidential.

Thank you for your participation.
